# Supplementary material for: Transcription Factor and Zeatin Co-Regulate Mixed Catkin Differentiation of Chinese Chestnut (Castanea mollissima)
Source: MDPI journal article supplement (doi:10.3390/f14102057), 2023-10-14
Supplement: s1 [file s1]

**Table S1.** Statistics of raw reads for transcriptome in *C. mollissima* 'Tanqiao'

| Sample | Raw reads  | Raw bases   | Clean reads | Clean bases | Q20(%) | Q30(%) | GC<br>content(%) |
|--------|------------|-------------|-------------|-------------|--------|--------|------------------|
| B0_1   | 55257766   | 8288664900  | 54593542    | 8080704122  | 97.07  | 92.23  | 43.92            |
| B0_2   | 75840052   | 11376007800 | 74935842    | 11035337548 | 97.04  | 92.17  | 43.98            |
| B0_3   | 83454564   | 12518184600 | 82512416    | 12085061643 | 97.24  | 92.62  | 45.07            |
| B1_1   | 79176524   | 11876478600 | 78296304    | 11511704076 | 97.25  | 92.64  | 44.68            |
| B1_2   | 75957078   | 11393561700 | 74568374    | 10656729373 | 97.24  | 92.63  | 44.51            |
| B1_3   | 60699700   | 9104955000  | 59906296    | 8623130677  | 97.19  | 92.52  | 44.09            |
| F1_1   | 79831128   | 11974669200 | 78801574    | 11438305392 | 97.14  | 92.41  | 44.77            |
| F1_2   | 60252838   | 9037925700  | 59499766    | 8645713345  | 97.1   | 92.35  | 45.37            |
| F1_3   | 69193232   | 10378984800 | 67915910    | 9910311755  | 97.16  | 92.46  | 44.41            |
| F2_1   | 81843074   | 12276461100 | 80822486    | 11739772169 | 97.12  | 92.35  | 44.21            |
| F2_2   | 72948924   | 10942338600 | 72079286    | 10422982748 | 97.2   | 92.53  | 44.59            |
| F2_3   | 86311810   | 12946771500 | 85001340    | 12456273840 | 97.13  | 92.4   | 43.86            |
| F3_1   | 83550252   | 12532537800 | 82158836    | 11733557595 | 97.19  | 92.54  | 44.81            |
| F3_2   | 65292536   | 9793880400  | 64460678    | 9529095254  | 96.97  | 92.04  | 44.24            |
| F3_3   | 64364600   | 9654690000  | 63571178    | 9305330629  | 97     | 92.12  | 44.7             |
| F4_1   | 75278630   | 11291794500 | 74257726    | 10746671147 | 97.12  | 92.37  | 44.61            |
| F4_2   | 45693754   | 6854063100  | 44888500    | 6346152147  | 96.98  | 92.11  | 44.78            |
| F4_3   | 53375714   | 8006357100  | 52574460    | 7604658850  | 97.03  | 92.22  | 42.69            |
| M1_1   | 93088634   | 13963295100 | 92017430    | 13455637205 | 97.17  | 92.45  | 42.94            |
| M1_2   | 67809912   | 10171486800 | 67118966    | 9874506639  | 97.27  | 92.63  | 43.59            |
| M1_3   | 73968224   | 11095233600 | 73133190    | 10687004019 | 97.21  | 92.51  | 43.92            |
| M2_1   | 44263092   | 6639463800  | 43520792    | 6312610361  | 97.14  | 92.43  | 42.21            |
| M2_2   | 47509060   | 7126359000  | 46865258    | 6807953253  | 97.16  | 92.43  | 42.8             |
| M2_3   | 80363358   | 12054503700 | 79475086    | 11537219747 | 97.44  | 93.02  | 42.97            |
| M3_1   | 85374010   | 12806101500 | 84366028    | 12223698549 | 97.28  | 92.7   | 44.31            |
| M3_2   | 88071132   | 13210669800 | 86892882    | 12558764651 | 97.09  | 92.31  | 44.22            |
| M3_3   | 77846018   | 11676902700 | 75682790    | 10783626955 | 97.11  | 92.35  | 44.12            |
| M4_1   | 82497072   | 12374560800 | 80007438    | 11631403041 | 97.99  | 94.36  | 43.06            |
| M4_2   | 132895064  | 19934259600 | 130108838   | 18698564708 | 98.2   | 94.75  | 43.99            |
| M4_3   | 66245236   | 9936785400  | 59248208    | 8331489809  | 96.74  | 92.44  | 42.94            |
| Total  | 2208252988 | 3.31238E+11 | 2169281420  | 3.14774E+11 | ~      | ~      | ~                |

**Table S2.** Data of clean reads mapping to reference chestnut genome in each stage

| Sample | Total reads | Total mapped      | Multiple mapped | Uniquely mapped  |
|--------|-------------|-------------------|-----------------|------------------|
| B0_1   | 54593542    | 50448132(92.41%)  | 2451369(4.49%)  | 47996763(87.92%) |
| B0_2   | 74935842    | 69384251(92.59%)  | 2788443(3.72%)  | 66595808(88.87%) |
| B0_3   | 82512416    | 76806636(93.08%)  | 6160557(7.47%)  | 70646079(85.62%) |
| B1_1   | 78296304    | 72675109(92.82%)  | 3320722(4.24%)  | 69354387(88.58%) |
| B1_2   | 74568374    | 69439619(93.12%)  | 3676807(4.93%)  | 65762812(88.19%) |
| B1_3   | 59906296    | 55456095(92.57%)  | 2629763(4.39%)  | 52826332(88.18%) |
| F1_1   | 78801574    | 73015411(92.66%)  | 3976827(5.05%)  | 69038584(87.61%) |
| F1_2   | 59499766    | 54942903(92.34%)  | 5961960(10.02%) | 48980943(82.32%) |
| F1_3   | 67915910    | 63492658(93.49%)  | 2742401(4.04%)  | 60750257(89.45%) |
| F2_1   | 80822486    | 74788699(92.53%)  | 3755076(4.65%)  | 71033623(87.89%) |
| F2_2   | 72079286    | 66787520(92.66%)  | 3297275(4.57%)  | 63490245(88.08%) |
| F2_3   | 85001340    | 78497303(92.35%)  | 5127043(6.03%)  | 73370260(86.32%) |
| F3_1   | 82158836    | 76456554(93.06%)  | 4698586(5.72%)  | 71757968(87.34%) |
| F3_2   | 64460678    | 59791446(92.76%)  | 2164032(3.36%)  | 57627414(89.4%)  |
| F3_3   | 63571178    | 58735564(92.39%)  | 3210968(5.05%)  | 55524596(87.34%) |
| F4_1   | 74257726    | 68504636(92.25%)  | 3756809(5.06%)  | 64747827(87.19%) |
| F4_2   | 44888500    | 41493109(92.44%)  | 9150016(20.38%) | 32343093(72.05%) |
| F4_3   | 52574460    | 48558214(92.36%)  | 1930233(3.67%)  | 46627981(88.69%) |
| M1_1   | 92017430    | 85225230(92.62%)  | 3585167(3.9%)   | 81640063(88.72%) |
| M1_2   | 67118966    | 62463033(93.06%)  | 2440505(3.64%)  | 60022528(89.43%) |
| M1_3   | 73133190    | 68425264(93.56%)  | 9583617(13.1%)  | 58841647(80.46%) |
| M2_1   | 43520792    | 40758863(93.65%)  | 2317804(5.33%)  | 38441059(88.33%) |
| M2_2   | 46865258    | 43741027(93.33%)  | 2005810(4.28%)  | 41735217(89.05%) |
| M2_3   | 79475086    | 74389874(93.6%)   | 3089957(3.89%)  | 71299917(89.71%) |
| M3_1   | 84366028    | 78547643(93.1%)   | 3492523(4.14%)  | 75055120(88.96%) |
| M3_2   | 86892882    | 80643279(92.81%)  | 4507988(5.19%)  | 76135291(87.62%) |
| M3_3   | 75682790    | 70570558(93.25%)  | 2975971(3.93%)  | 67594587(89.31%) |
| M4_1   | 80007438    | 73556543(91.94%)  | 3266268(4.08%)  | 70290275(87.85%) |
| M4_2   | 130108838   | 119941810(92.19%) | 5310655(4.08%)  | 114631155(88.1%) |
| M4_3   | 59248208    | 51395604(86.75%)  | 3110821(5.25%)  | 48284783(81.5%)  |
